# Supplementary material
Source: PubMed Central journal article supplement (PMC2151705)
Supplement: plntphys_pp.107.103945_8.pdf [file plntphys_pp.107.103945_8.pdf]

## Supplementary Figure S8

### Primers used in this study

|    |                                    |                                                       |
|----|------------------------------------|-------------------------------------------------------|
| 1  | ( <i>Xba</i> I) <i>phsI</i> sp fwd | 5'-ATATATAT <u>TCTAGA</u> ATGATGAGAGCAAGGGTCCACTCC-3' |
| 2  | sp RFP rev                         | 5'-GATGACGTCCTCGGAGGAGGCGCAAATGAGGCAGAAAGTG-3'        |
| 3  | sp RFP fwd                         | 5'-CACTTCTGCCTCATTGCGCCTCTCCGAGGACGTCATC-3'           |
| 4  | RFP ( <i>Sac</i> I) rev            | 5'-TAATGATGGAGCTCTTAGGCGCCGGTGGAGTGGC-3'              |
| 5  | RFP afvy ( <i>Sac</i> I) rev       | 5'-ATATATATTCAGTACACAAAGGCGCCGGTGGAGTGGCGGCCCTCGGC-3' |
| 6  | linker RFP fwd                     | 5'-GTGGTACCAAATTTAATATGGCCTCTCCGAGGACGTCATCAAGG-3'    |
| 7  | RFP linker rev                     | 5'-CCTTGATGACGTCCTCGGAGGAGCCATATTTAAAATTTGGTACCAC-3'  |
| 8  | QC sp:RFP:linker fwd               | 5'-GCGCCTCTTTGCTTGGAAGGCCAGTGGTACC-3'                 |
| 9  | QC sp:RFP:linker rev               | 5'-GGTACCACTGGCCTTCCAAGCAAAGAGGCGC-3'                 |
| 10 | $\alpha$ -fwd                      | 5'-ATATATATCCATGGCCGCAACATCAGCTCGTAGAGCAT-3',         |
| 11 | $\alpha$ -rev                      | 5'-AATCGAACCCATGGCGTAATCTTCAGGGGCCAAGGGCT-3'          |
| 12 | $\gamma$ -fwd                      | 5'-ATATATATCCATGGCCCGATCAGAAACATCGCCATTGGCCGTCCA-3'   |
| 13 | $\gamma$ -rev                      | 5'-AATCGAACCCATGGCGTAGTCTGTGGTTGGGAGCTGCTCGTGTGT-3',  |
| 14 | $\delta$ -fwd                      | 5'-ATATATATCCATGGCCGCTGGAGTTGCCTTTGGTTCCTTTGATGAT-3'  |
| 15 | $\delta$ -rev                      | 5'-AATCGAACCCATGGCGAAATCAGCAGAAGCAAGAGGAACATGTTC-3'   |
| 16 | $\alpha(2)$ -fwd                   | 5'-ATATATATCCCGGGATGGCCGCAACATCAGCTCGTAGAGCAT-3'      |
| 17 | $\alpha(2)$ -rev                   | 5'-AATCGAACGAGCTCCTAGTAATCTTCAGGGGCCAAGGGCT-3'        |
| 18 | $\gamma(2)$ -fwd                   | 5'-ATATATATCCCGGGATGCCGATCAGAAACATCGC-3'              |
| 19 | $\gamma(2)$ -rev                   | 5'-AATACGTCGAGCTCTCAGTAGTCTGTGGTTGGGA-3'              |
| 20 | YFP-fwd                            | 5'-ATATATATCTCGAGGGATCCAAGGGCGAGGAGCTGTTCAC-3'        |
| 21 | YFP-rev                            | 5'-ACTGACTACCCGGGTCACCTTGACAGCTCGTCC-3'               |
| 22 | Nat 5' $\alpha$ -fwd               | 5'-CGTGGACAGGTACCTTGAAGAAATCACACTCCGA-3'              |
| 23 | Nat 5' $\alpha$ -rev               | 5'-ACTGACTACTCGAGGTAATCTTCAGGGGCCAAGG-3'              |
| 24 | Nat 5' $\gamma$ -fwd               | 5'-CGTGGACAGGTACCCAATGGATCATCCACCTAAC-3'              |
| 25 | Nat. 5' $\gamma$ -rev              | 5'-ACTGACTACTCGAGGTAGTCTGTGGTTGGGAGCT-3'              |
| 26 | Nat. 5' $\delta$ -fwd              | 5'-CGTGGACAGGTACCATCTCAGCATATGATACAAA-3'              |

|    |                       |                                             |
|----|-----------------------|---------------------------------------------|
| 27 | Nat. 5 $\delta$ -rev  | 5'-ACTGACTACTCGAGGAAATCAGCAGAAGCAAGAG-3'    |
| 28 | Nat. 3' $\alpha$ -fwd | 5'-CGTGGACACCCGGGATGGAACCTTCCTCATGTCA-3'    |
| 29 | Nat. 3' $\alpha$ -rev | 5'-ACTGACTAGCGGCCGCCACAATAACAAGGAGAAGAA-3'  |
| 30 | Nat. 3' $\gamma$ -fwd | 5'-CGTGGACACCCGGGATTAATCTCTCTTTTCTCT-3'     |
| 31 | Nat. 3' $\gamma$ -rev | 5'-ACTGACTAGCGGCCCGCTGTAATAAGACTGATGTGG-3'  |
| 32 | Nat. 3' $\delta$ -fwd | 5'-CGTGGACACCCGGGGGAAACAAGTGATGATTCTT-3'    |
| 33 | Nat. 3' $\delta$ -rev | 5'-ACTGACTAGCGGCCCGCTGAAACCATCCATTAATTTG-3' |
