# Supplementary material
Source: PubMed Central journal article supplement (PMC2151705)

Figure S1

A

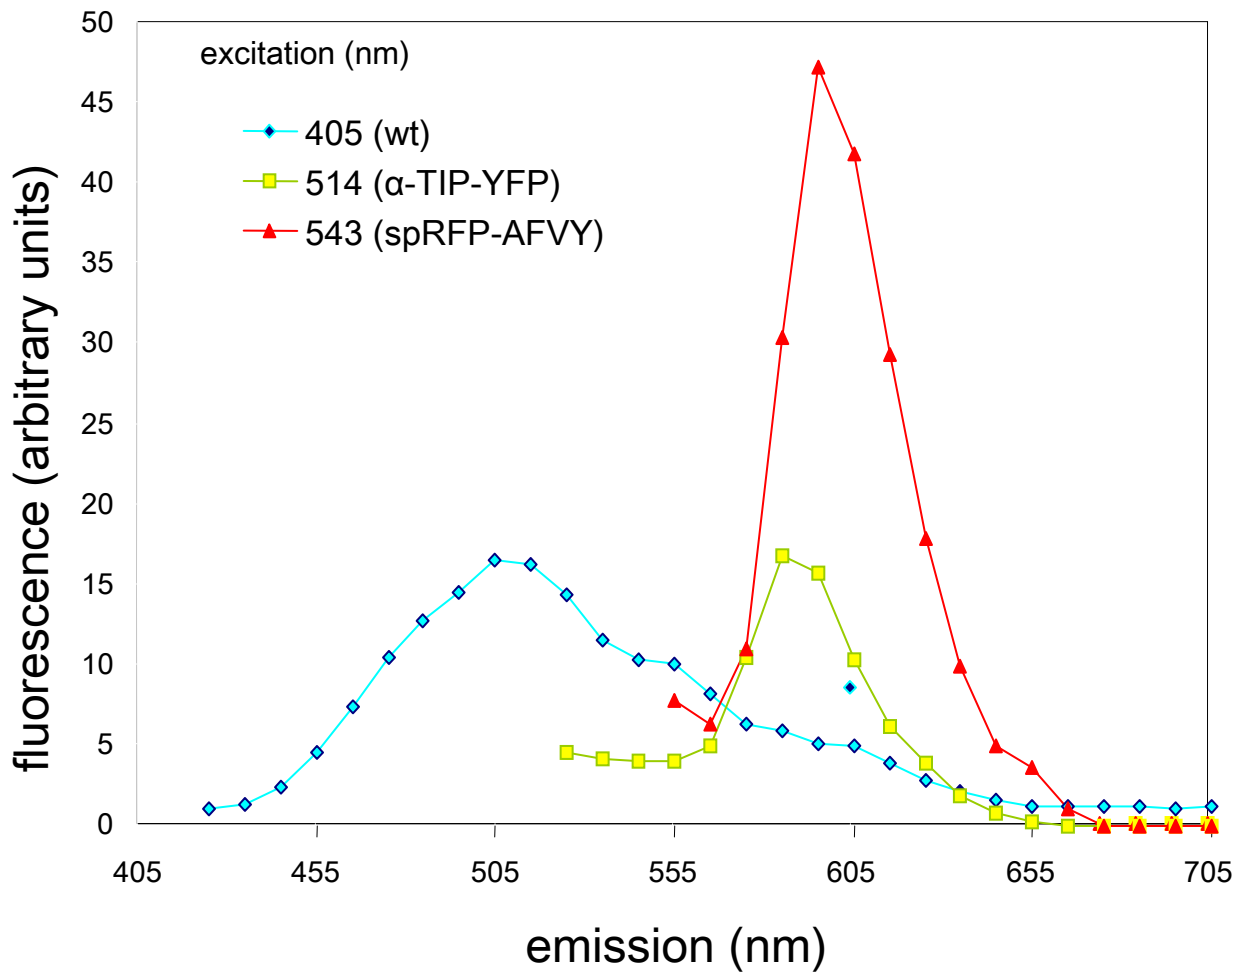

B

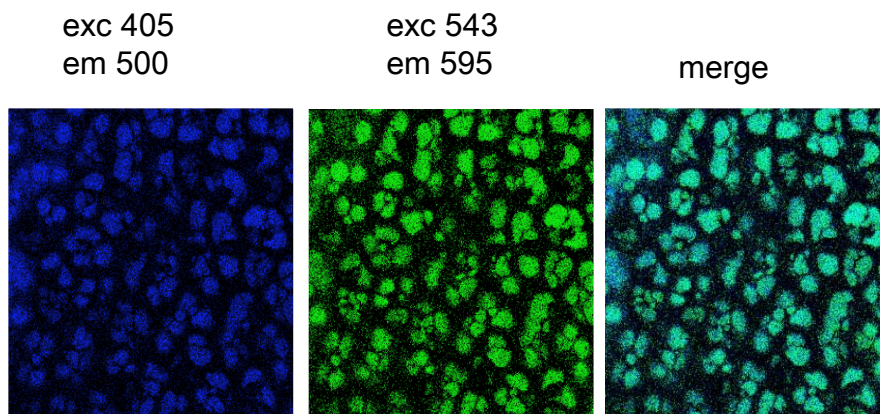

Supplement: plntphys_pp.107.103945_1.pdf [file plntphys_pp.107.103945_1.pdf]

Figure S2

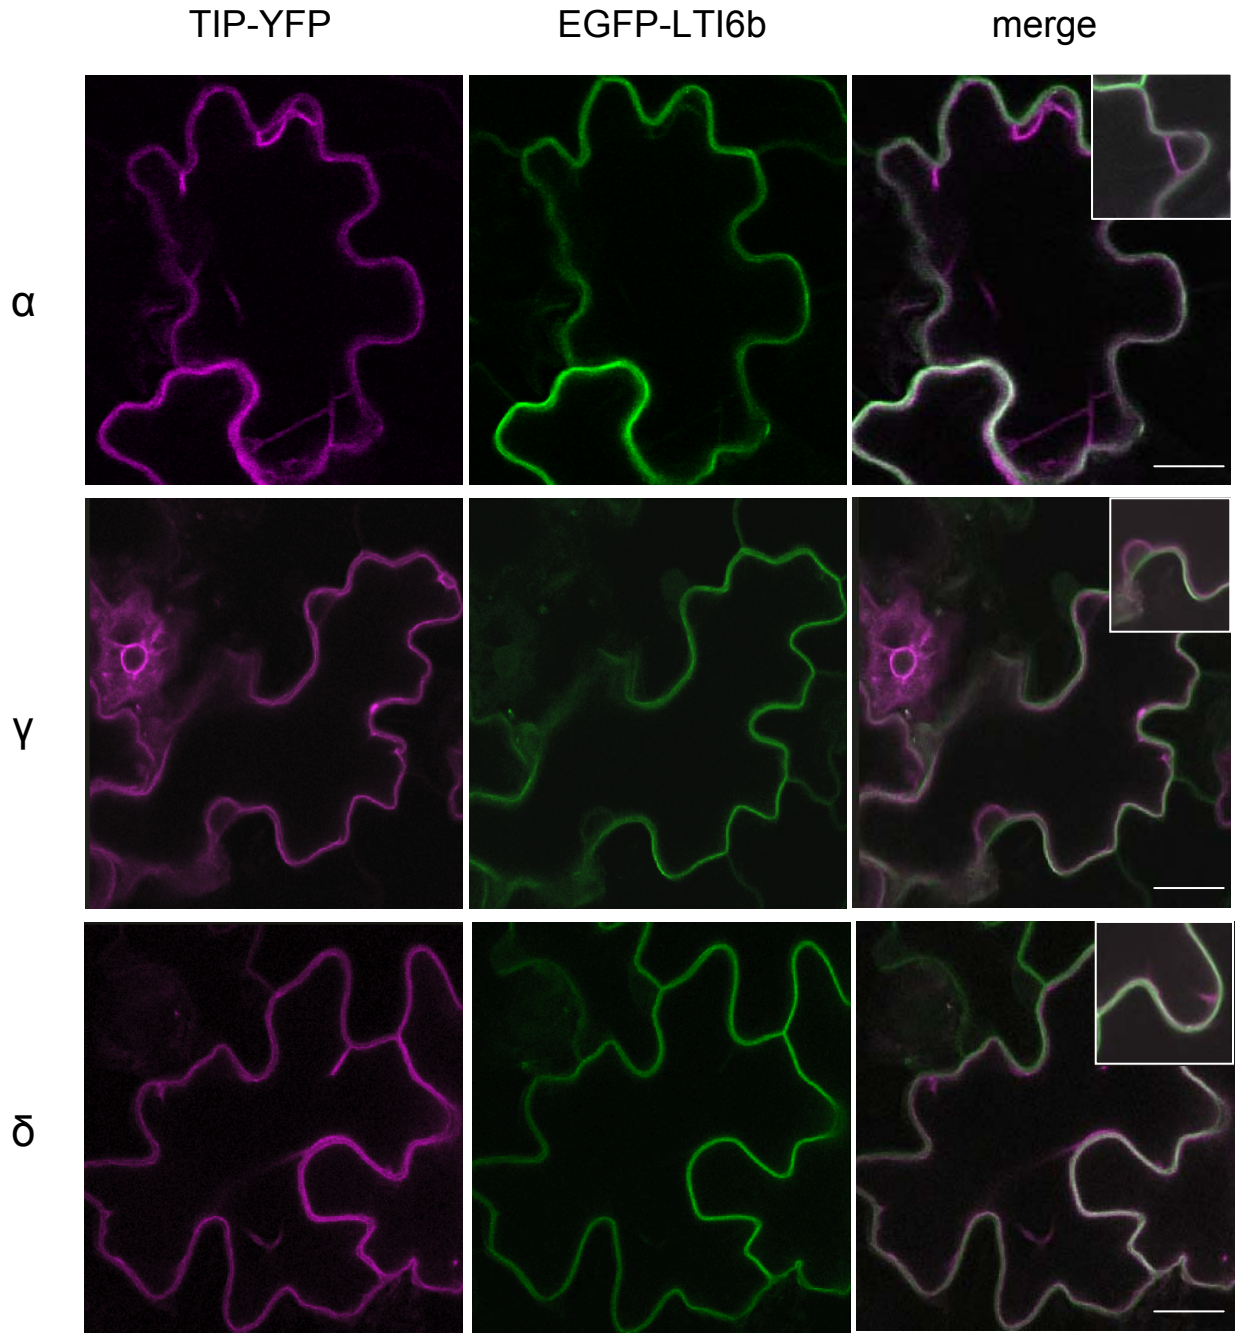

Supplement: plntphys_pp.107.103945_2.pdf [file plntphys_pp.107.103945_2.pdf]

Figure S3

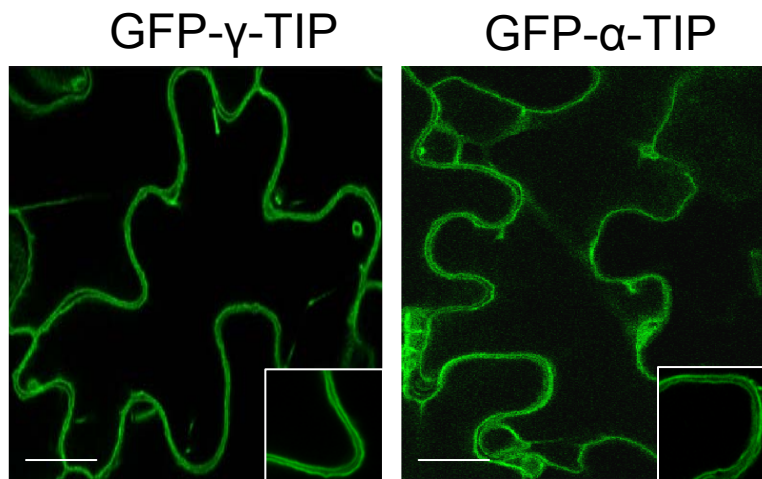

Supplement: plntphys_pp.107.103945_3.pdf [file plntphys_pp.107.103945_3.pdf]

Figure S4

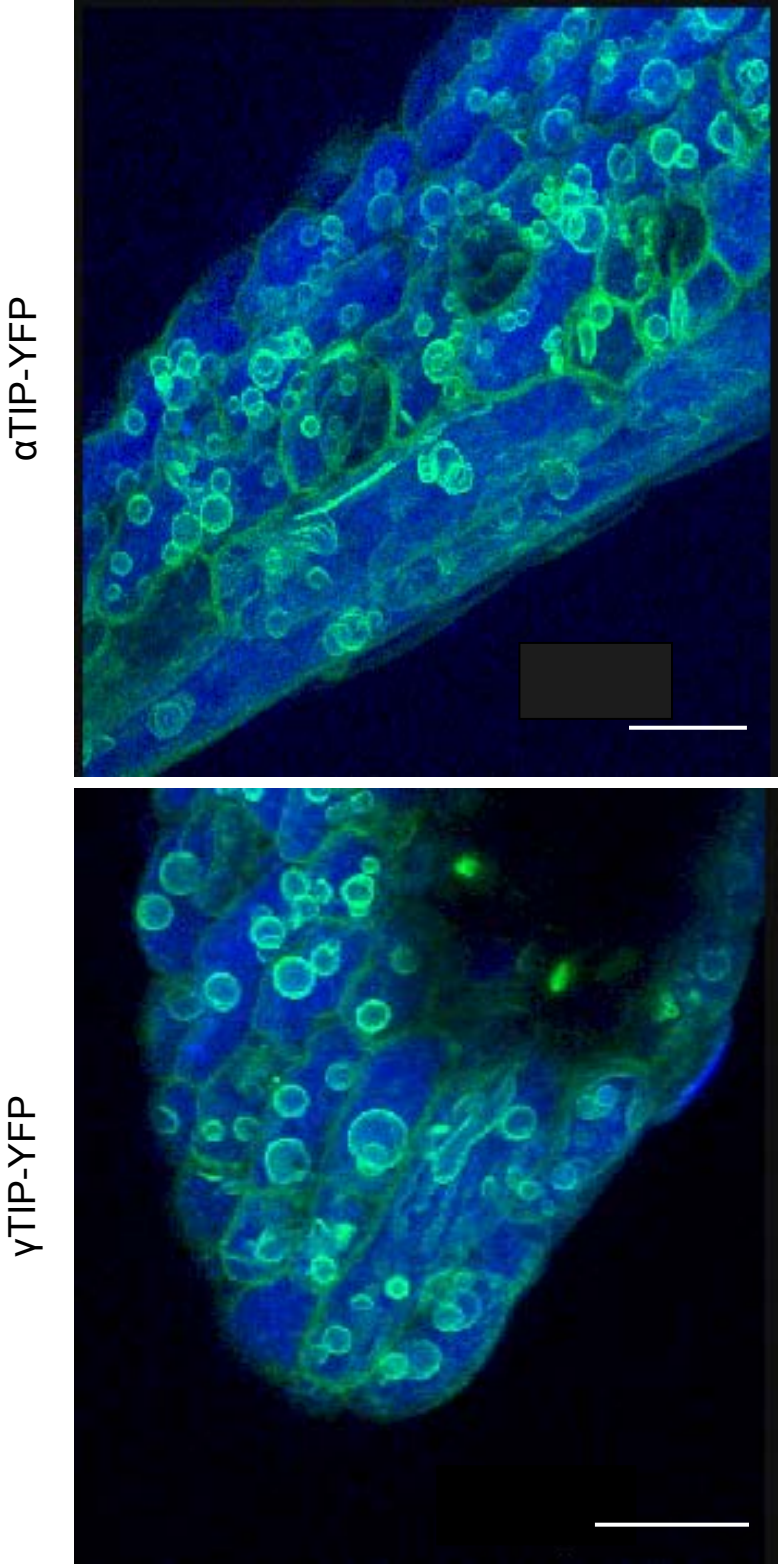

Supplement: plntphys_pp.107.103945_4.pdf [file plntphys_pp.107.103945_4.pdf]

Figure S5

A

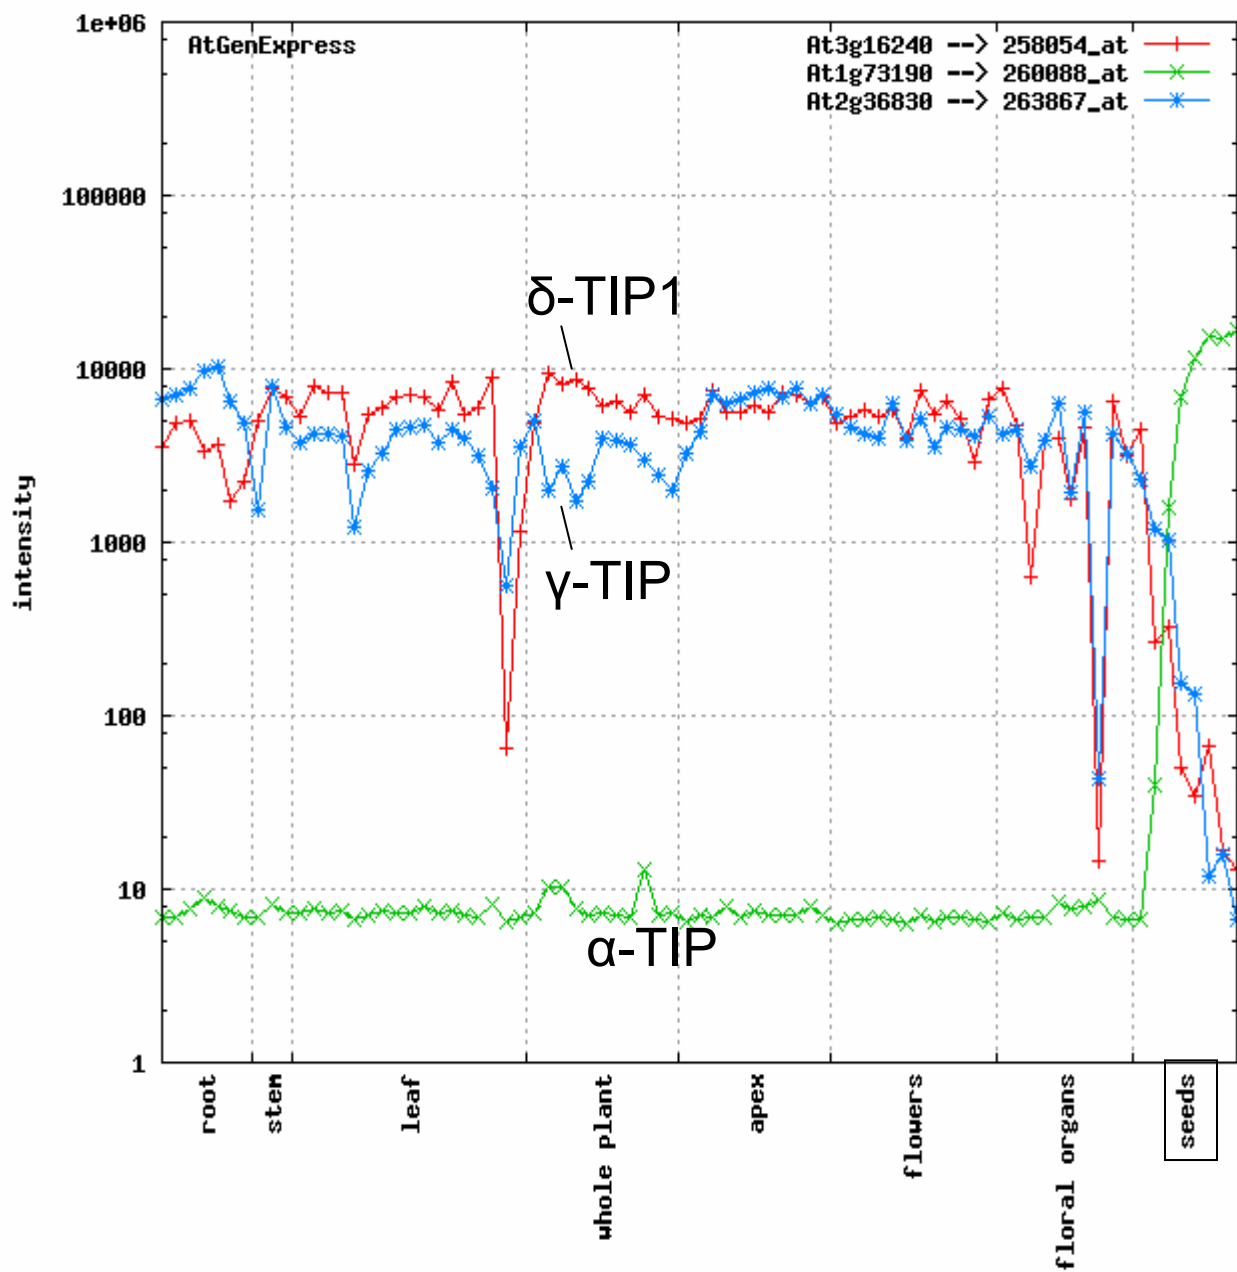

B

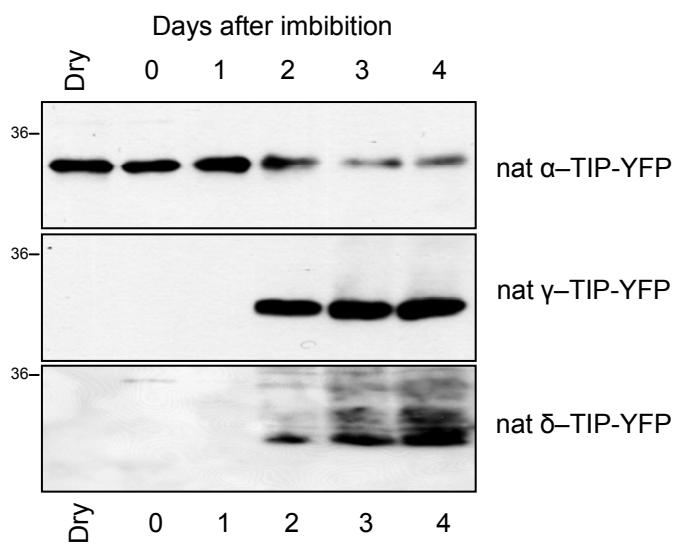

Supplement: plntphys_pp.107.103945_5.pdf [file plntphys_pp.107.103945_5.pdf]

Figure S6

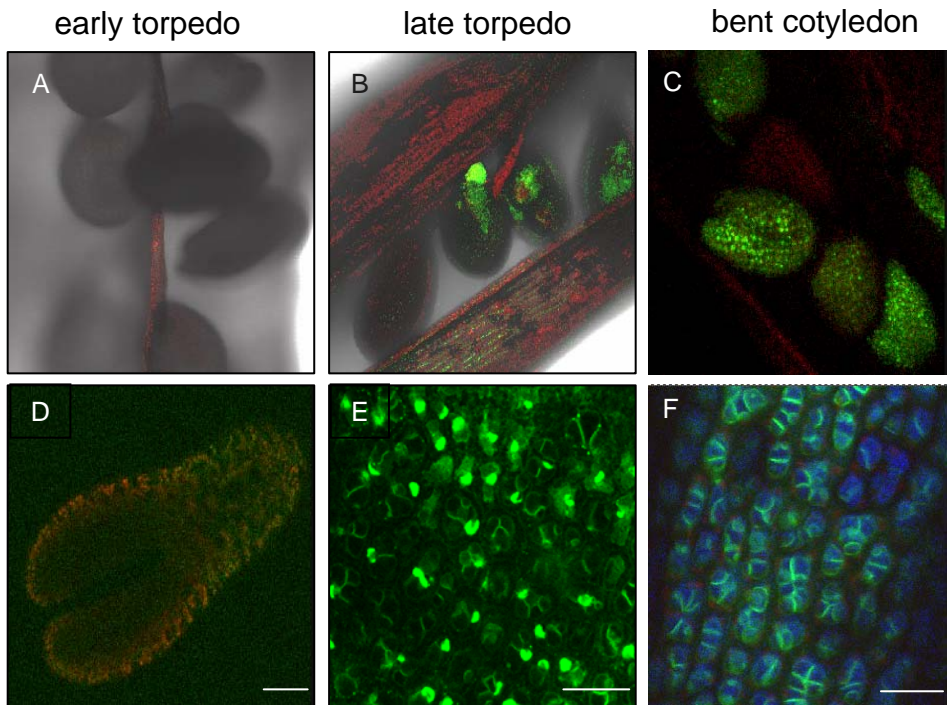

Supplement: plntphys_pp.107.103945_6.pdf [file plntphys_pp.107.103945_6.pdf]

Figure S7

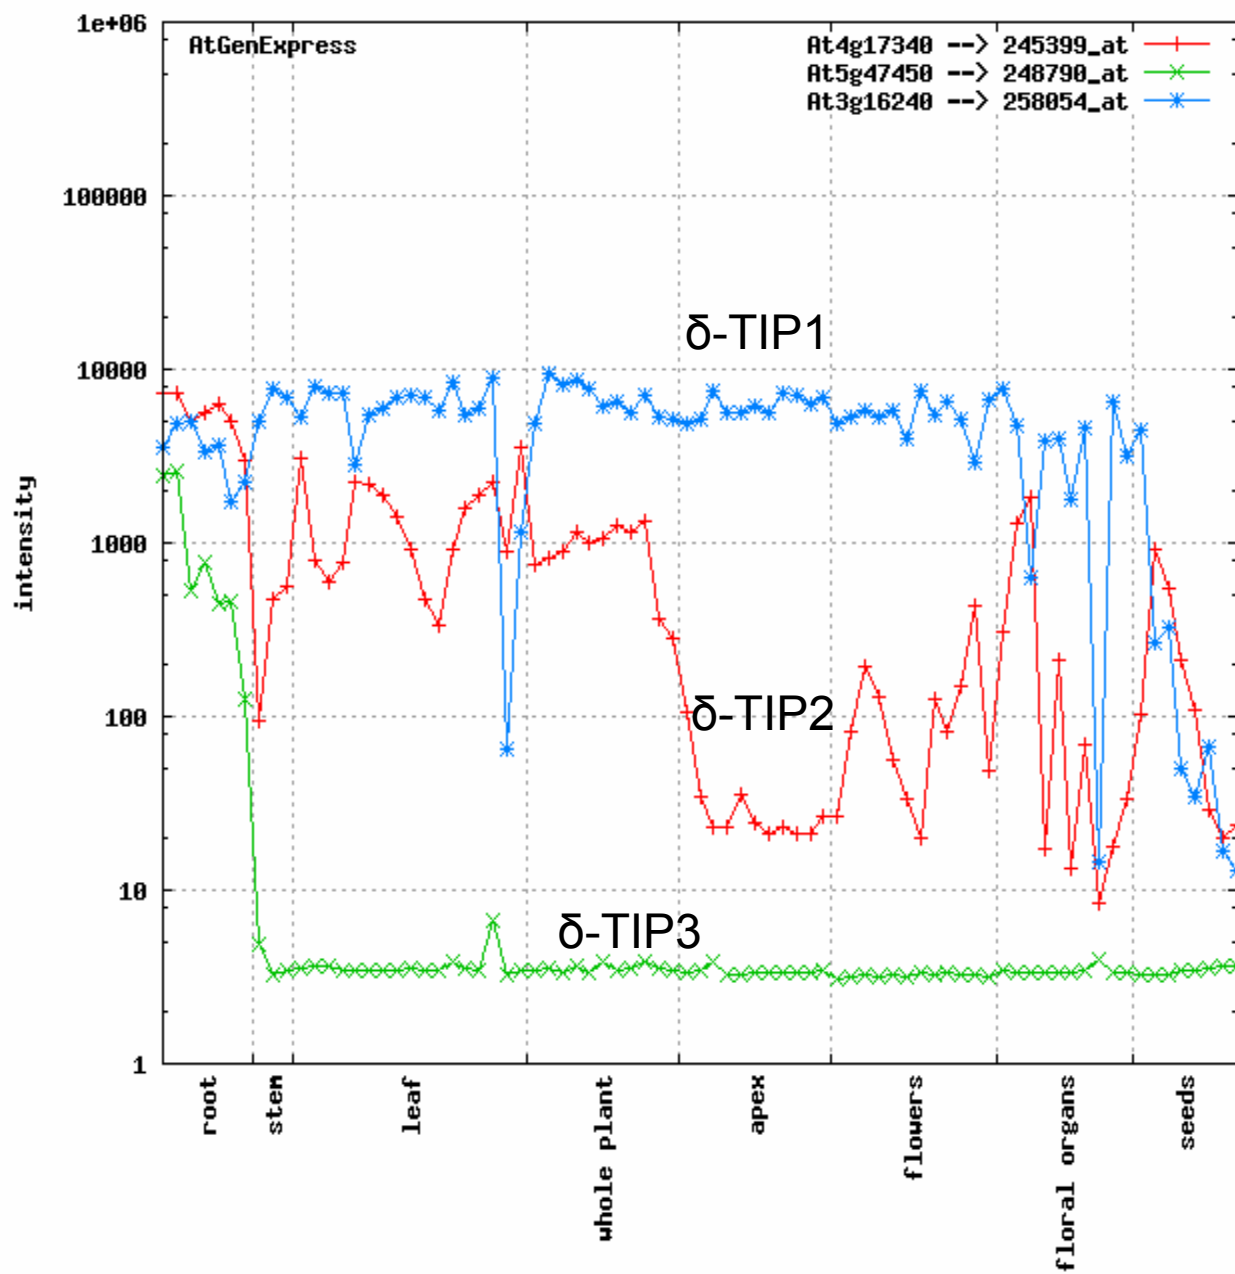

Supplement: plntphys_pp.107.103945_7.pdf [file plntphys_pp.107.103945_7.pdf]
